# Supplementary material for: Dirección estratégica de la tecnología: el caso de isofotón
Source: MDPI journal article supplement (doi:10.3390/pharmaceutics14112297), 2005-01-01
Supplement: s1 [file s1]

Article

# Pulmonary Safety Profile of Esc Peptides and Esc-Peptide-Loaded Poly(lactide-co-glycolide) Nanoparticles: A Promising Therapeutic Approach for Local Treatment of Lung Infectious Diseases

Floriana Cappiello <sup>1,†</sup>, Bruno Casciaro <sup>1,†</sup>, Maria Rosa Loffredo <sup>1</sup>, Elena Puglisi <sup>1</sup>, Qiao Lin <sup>2</sup>, Dandan Yang <sup>2</sup>, Gemma Conte <sup>3</sup>, Ivana d'Angelo <sup>4</sup>, Francesca Ungaro <sup>3</sup>, Loretta Ferrera <sup>5</sup>, Raffaella Barbieri <sup>6</sup>, Laura Cresti <sup>7</sup>, Alessandro Pini <sup>7</sup>, Yuanpu Peter Di <sup>2,\*</sup> and Maria Luisa Mangoni <sup>1,\*</sup>

<sup>1</sup> Department of Biochemical Sciences, Laboratory Affiliated to Istituto Pasteur Italia-Fondazione Cenci Bolognetti, Sapienza University of Rome, 00185 Rome, Italy

<sup>2</sup> Department of Environmental and Occupational Health, University of Pittsburgh, Pittsburgh, PA 15261, USA

<sup>3</sup> Department of Pharmacy, University of Napoli Federico II, 80131 Napoli, Italy

<sup>4</sup> Department of Environmental, Biological and Pharmaceutical Sciences and Technologies (DiSTABiF), University of Campania Luigi Vanvitelli, 81100 Caserta, Italy

<sup>5</sup> U.O.C. Genetica Medica, IRCCS, Istituto Giannina Gaslini, 16147 Genoa, Italy

<sup>6</sup> Biophysic Institute, Consiglio Nazionale delle Ricerche (CNR), 16149 Genoa, Italy

<sup>7</sup> Department of Medical Biotechnologies, University of Siena, 53100 Siena, Italy

\* Correspondence: peterdi@pitt.edu (Y.P.D.); marialuisa.mangoni@uniroma1.it (M.L.M.)

† These authors contributed equally to the work.

## Esc(1-21)

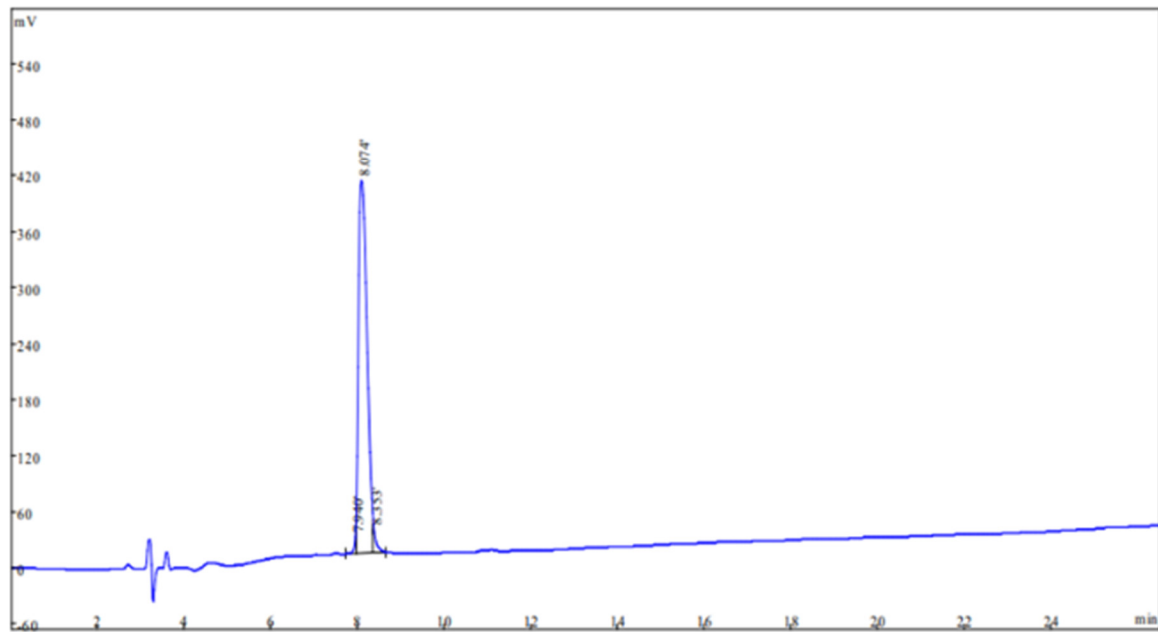

## Esc(1-21)-1c

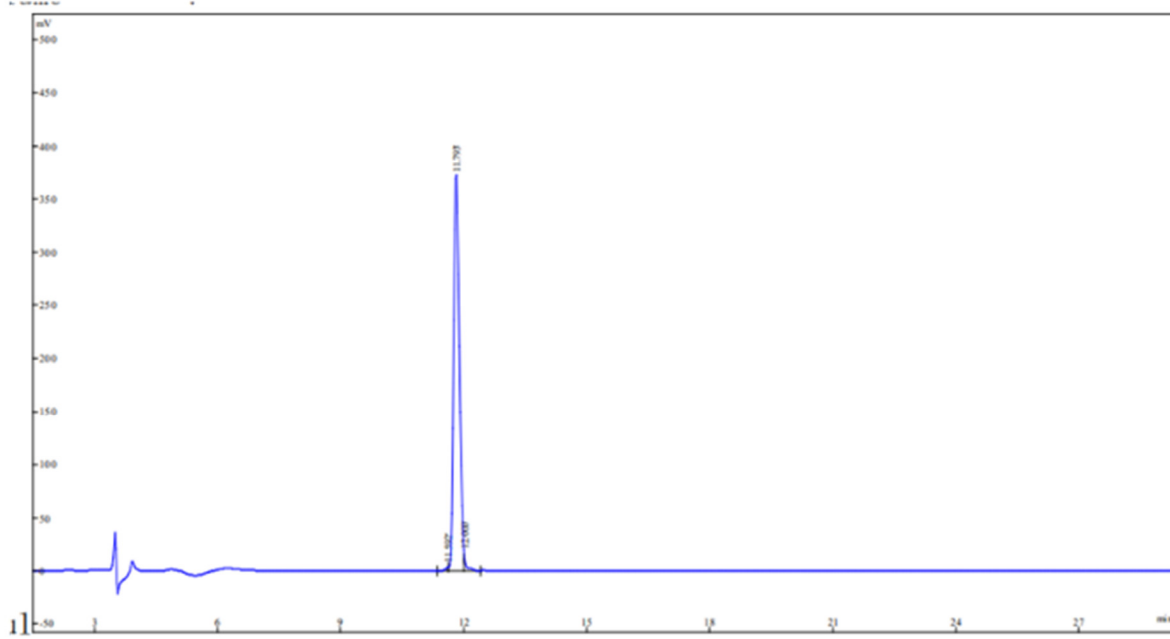

## Esc(1-21)

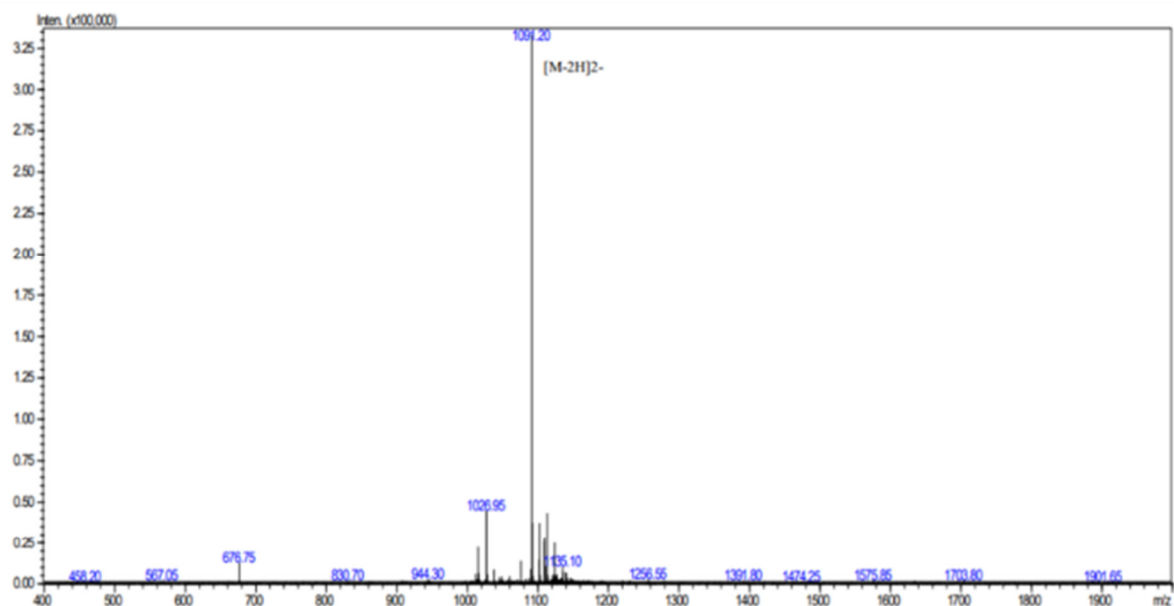

## Esc(1-21)-1c

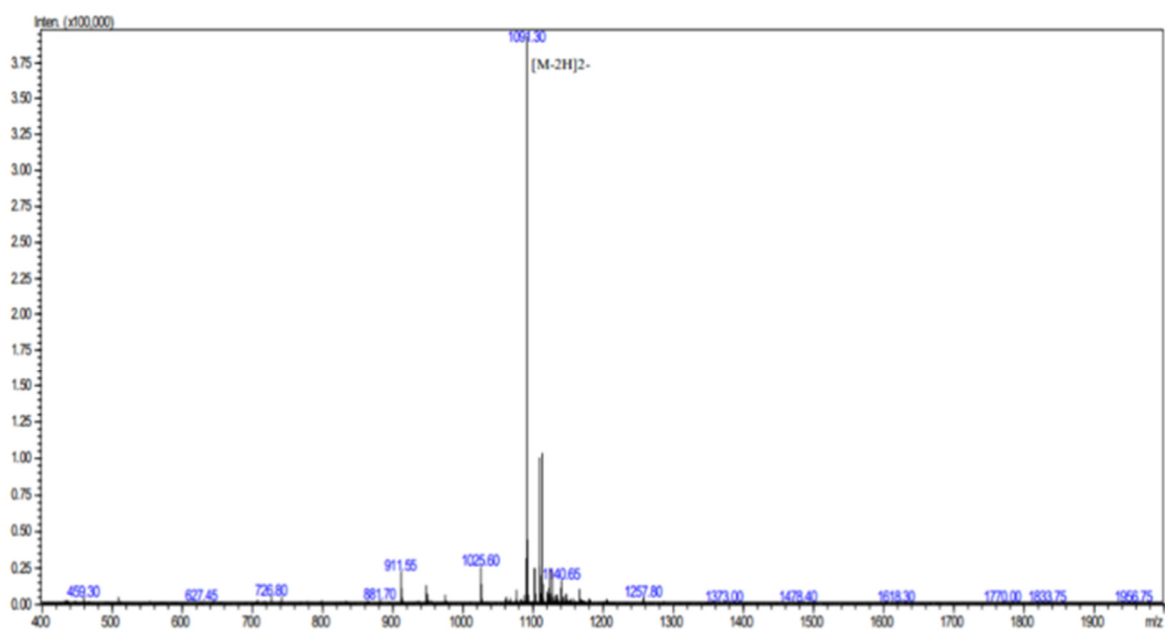

Figure S1. HPLC and mass spectra of Esc peptides.

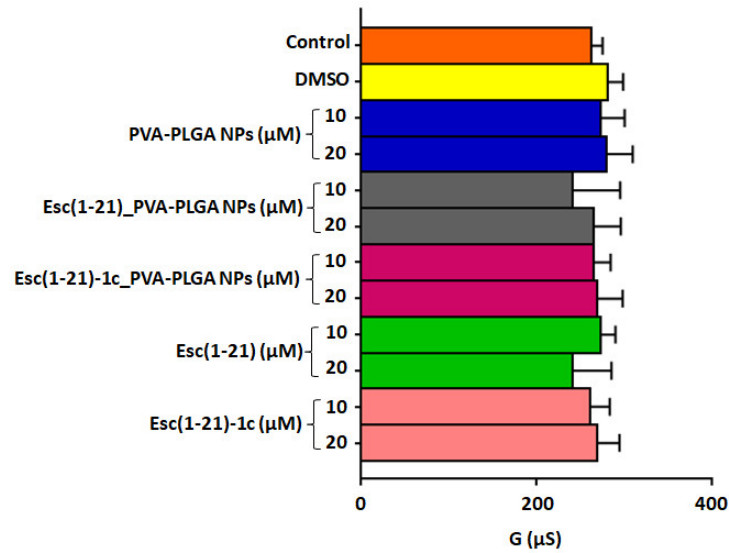

**Figure S2.** Effect of bare or Esc peptide-loaded PVA-PLGA NPs on F508del-FRT epithelium integrity after 24 h incubation. Untreated cells (control) and peptides in the soluble free form were also reported for comparison. Data are expressed as mean  $\pm$  S.E.M. from three independent experiments. No statistical difference was found.

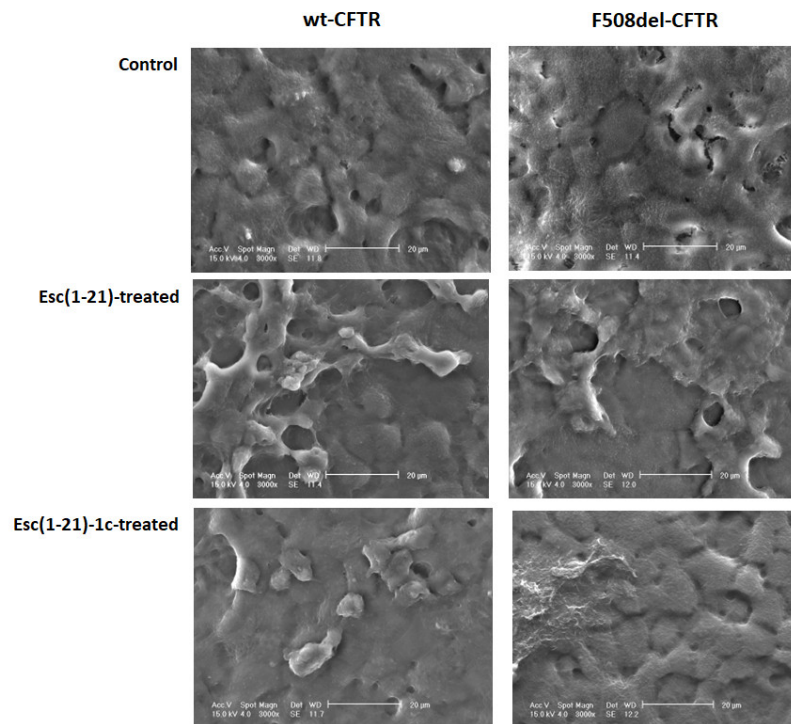

**Figure S3.** SEM images of bronchial epithelia. Wild type (wt) and F508del-bronchial epithelium were treated for 5 h with 20  $\mu$ M Esc peptides and compared to untreated samples. Scale bar, 20  $\mu$ m.

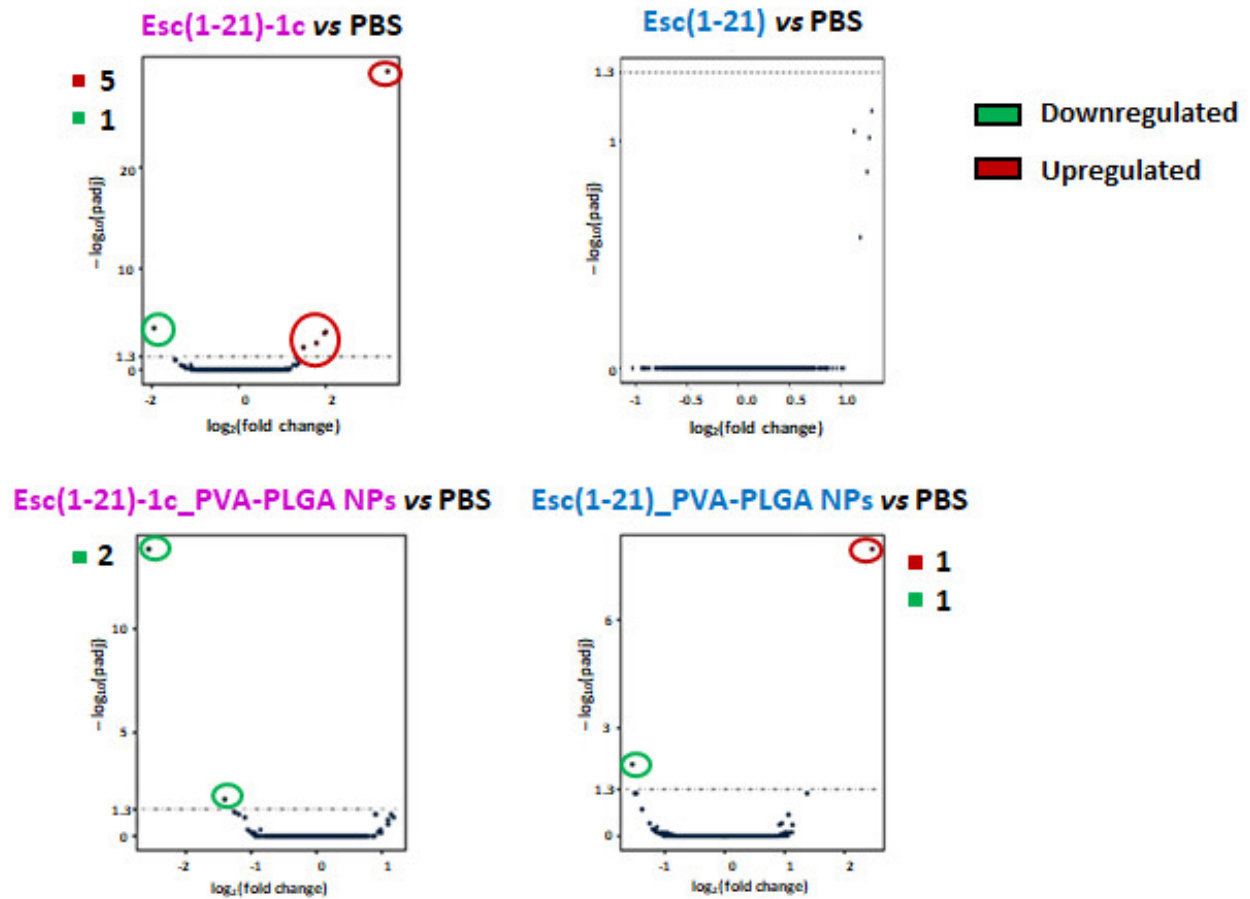

**Figure S4.** Effect of free or encapsulated peptides on lung gene expression. Volcano plots show differentially expressed genes at a threshold over 2-fold changes with  $p$  value  $< 0.05$  from three biological replicates.

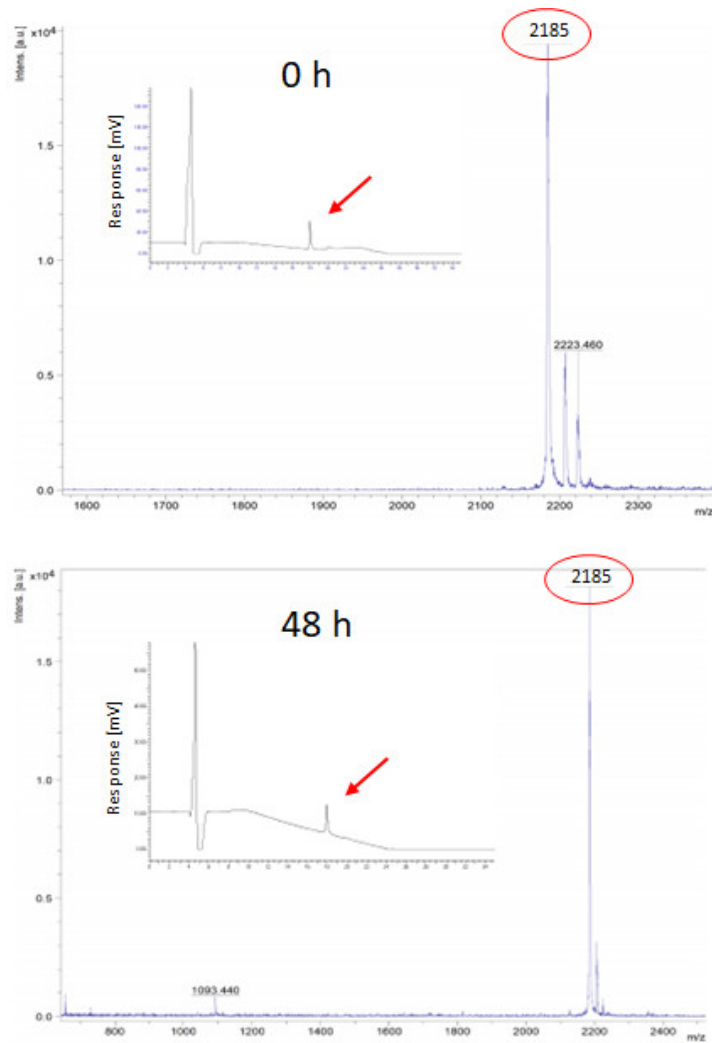

**Figure S5.** Mass spectra of Esc(1-21)-1c after 48 h incubation with mouse BAL. The peak of molecular mass of 2185 corresponding to the full-length peptide is marked in red. The arrows indicate the peak of 2185 molecular mass found for Esc(1-21)-1c at time 0 and after 48 h incubation with BAL.
